# Supplementary material
Source: publisher figshare collection journal article supplement (https://acs.figshare.com/ndownloader/files/3749968)
Supplement: Supplementary file 1 [file 3749968]

# *Aqueous extractive upgrading of bio-oils created by tail-gas reactive pyrolysis to produce pure hydrocarbons and phenols*

Yaseen Elkasabi, Charles A. Mullen, Akwasi A. Boateng

## *Supplemental Materials*

| <u>paraffins</u>      | <u>naphtha</u>                    | <u>BTEX/aromatics</u>             | <u>Phenols</u>                       |
|-----------------------|-----------------------------------|-----------------------------------|--------------------------------------|
| 2-methylbutane        | decalin                           | Benzene                           | Phenol                               |
| 2-methylpentane       | cyclopentane                      | Toluene                           | o-cresol                             |
| 2,4-dimethylpentane   | cyclopentane, methyl              | Ethyl Benzene                     | m-cresol                             |
| n-pentane             | cyclohexane                       | p-xylene                          | p-cresol                             |
| n-hexane              | cyclohexane, methyl-              | o-xylene                          | 2,4-dimethylphenol                   |
| n-heptane             | cyclohexane, 1,3-dimethyl         | benzene, n-propyl                 | 4-ethylphenol                        |
| n-octane              | cyclohexane, 1,2-dimethyl-(trans) | benzene, n-butyl                  |                                      |
| n-nonane <sup>1</sup> | cyclohexane,1,2-dimethyl-(cis)    |                                   |                                      |
| n-decane              | cyclohexane,ethyl-                | <u>PAHs</u>                       | <u>Methyl tetralins</u> <sup>3</sup> |
| n-dodecane            | cyclohexane,isopropyl-            | Biphenyl                          | 2-methyltetralin                     |
| n-tridecane           | cyclohexane,n-propyl-             | Fluorene                          | 1-methyltetralin                     |
| n-tetradecane         | cyclohexane,isobutyl-             | Anthracene                        | 6-methyltetralin                     |
| n-pentadecane         | cyclohexane,t-butyl-              |                                   |                                      |
| n-hexadecane          | cyclohexane,n-butyl-              |                                   |                                      |
| n-heptadecane         |                                   |                                   |                                      |
| n-octadecane          | <u>acids</u>                      | <u>naphthalenes</u>               |                                      |
| n-nonadecane          | Acetic Acid                       | naphthalene                       |                                      |
| n-eicosane            | Acetol                            | 2-methyl naphthalene              |                                      |
| n-heneicosane         |                                   | 1-methyl naphthalene <sup>2</sup> |                                      |

Table S1 – lumped categories of compounds quantified by GC-MS. This list excludes compounds which were calibrated but did not appear beyond trace amounts. <sup>1</sup>Assumed to scale according to n-octane. <sup>2</sup>assumed to scale according to 2-methyl naphthalene <sup>3</sup>assumed to scale according to tetralin.

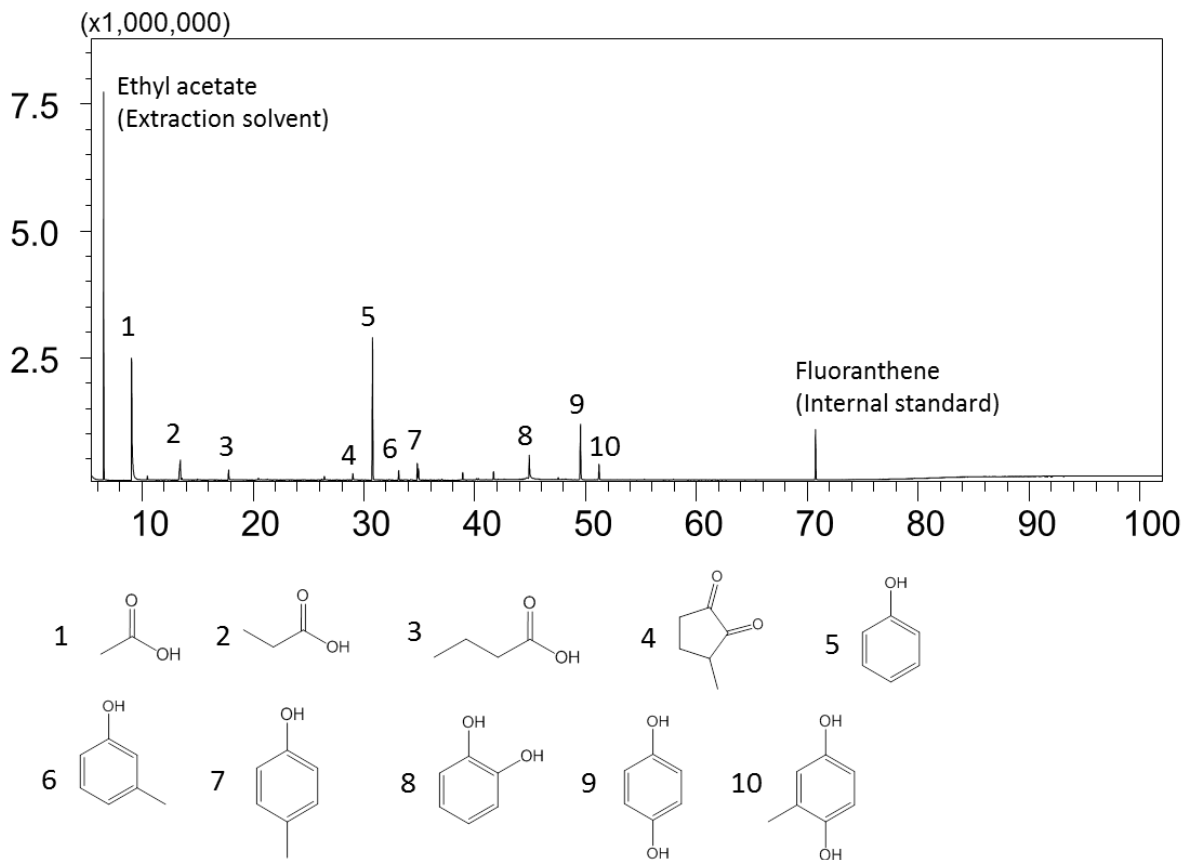

Figure S1 – chromatogram of organic compounds extracted from the 3a aqueous layer, post-acidification of phenolic salts.

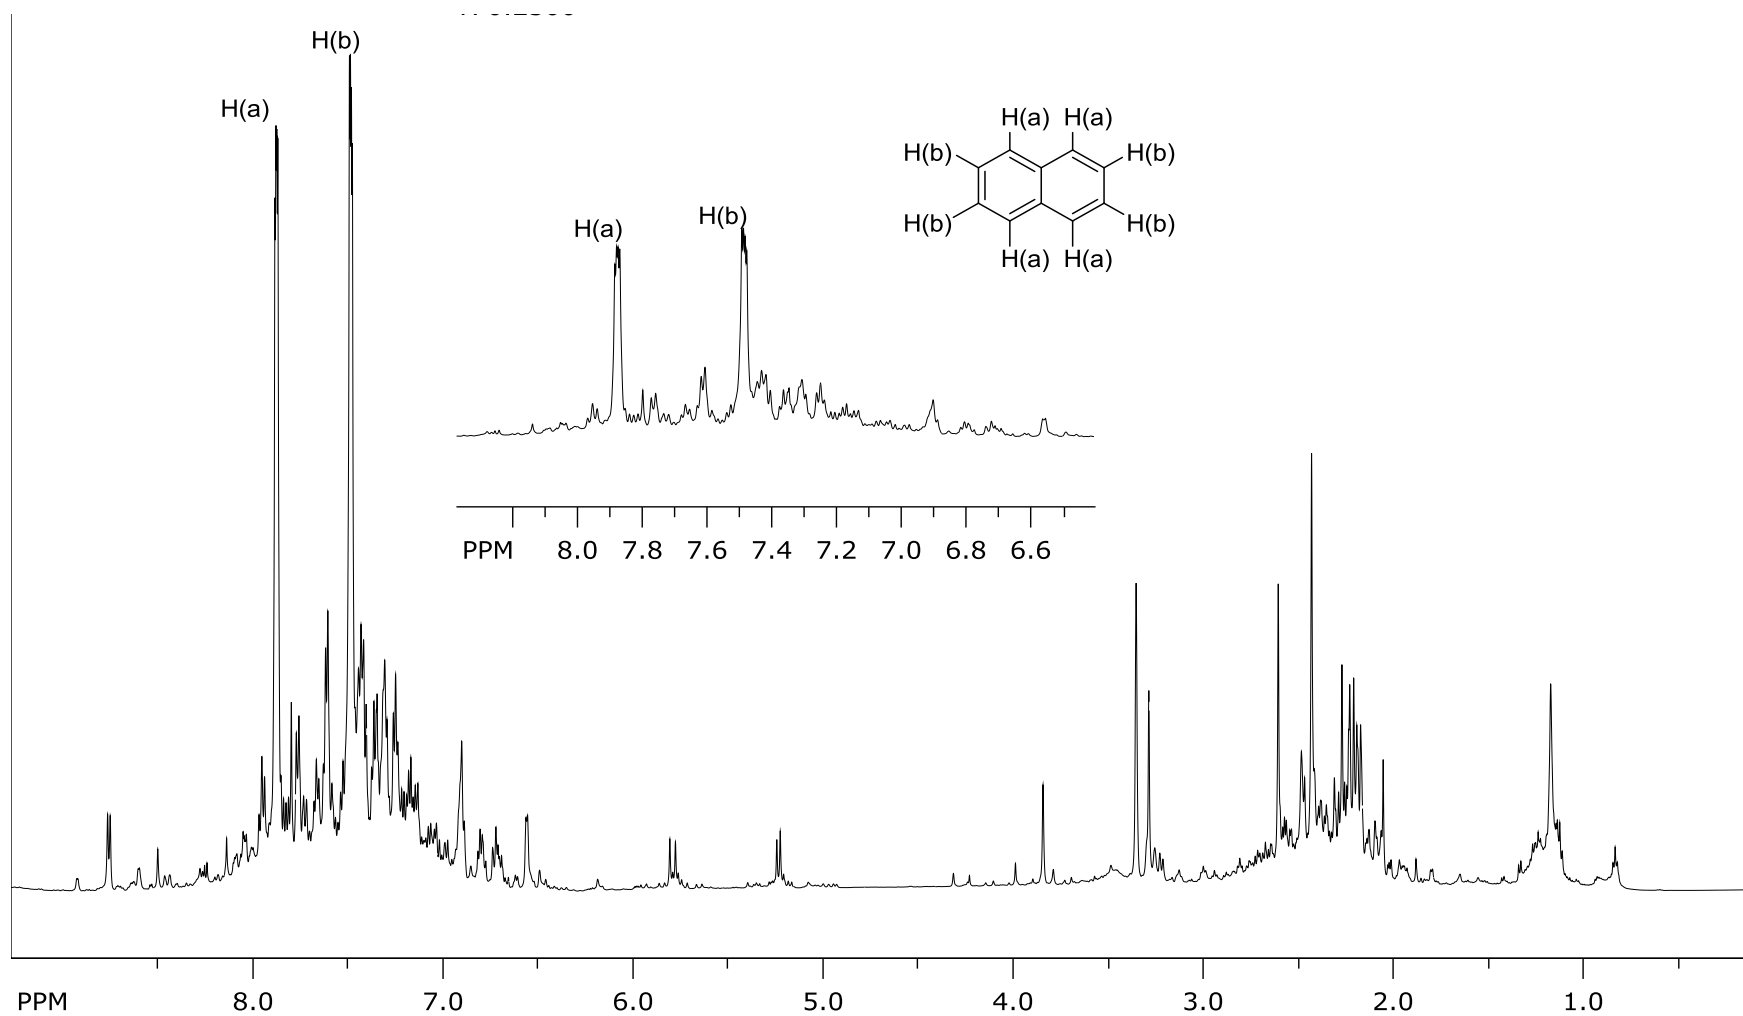

Figure S2.  $^1\text{H}$  NMR (600 MHz,  $\text{DMSO-d}_6$ ) spectrum of fraction 2a hydrocarbons extracted from horse manure bio-oil. Peaks assigned to naphthalene are labeled.

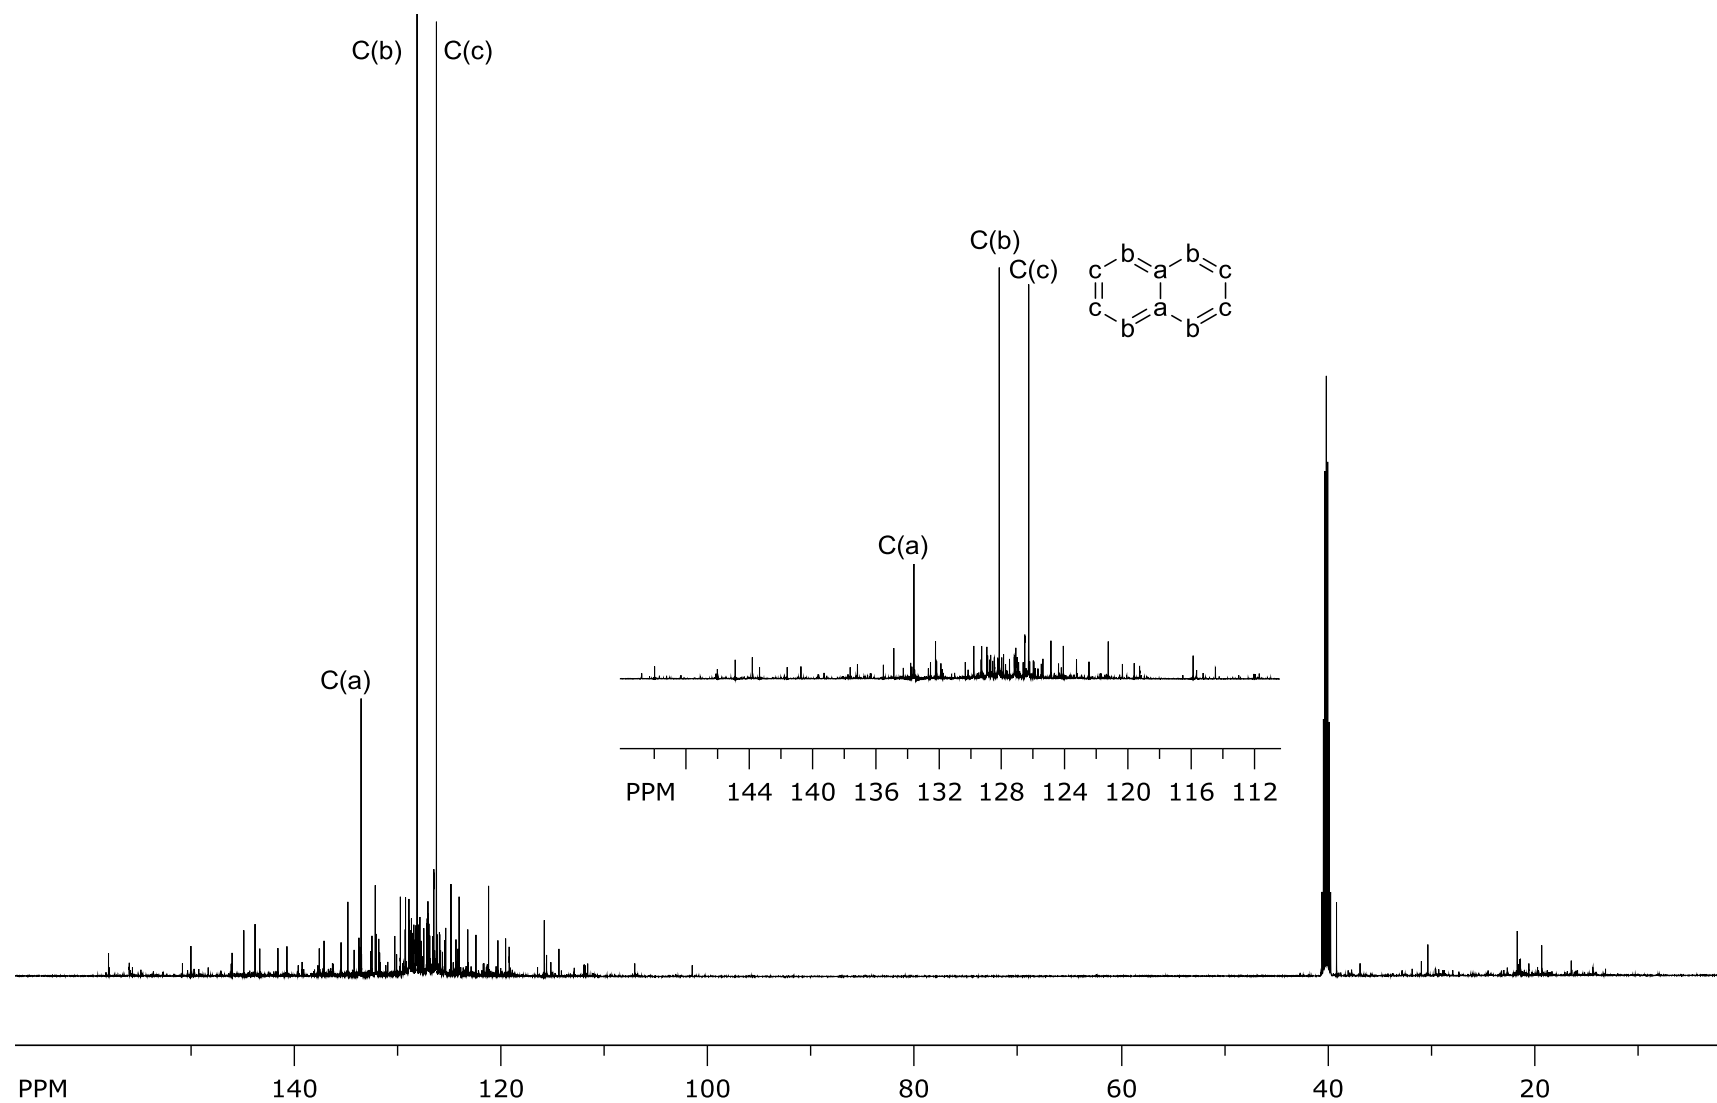

Figure S3 –  $^{13}\text{C}\{^1\text{H}\}$  NMR spectrum (150 MHz,  $\text{DMSO-d}_6$ ) of fractions 2a hydrocarbons extracted from horse manure bio-oil. Peaks assigned to naphthalene are labeled.

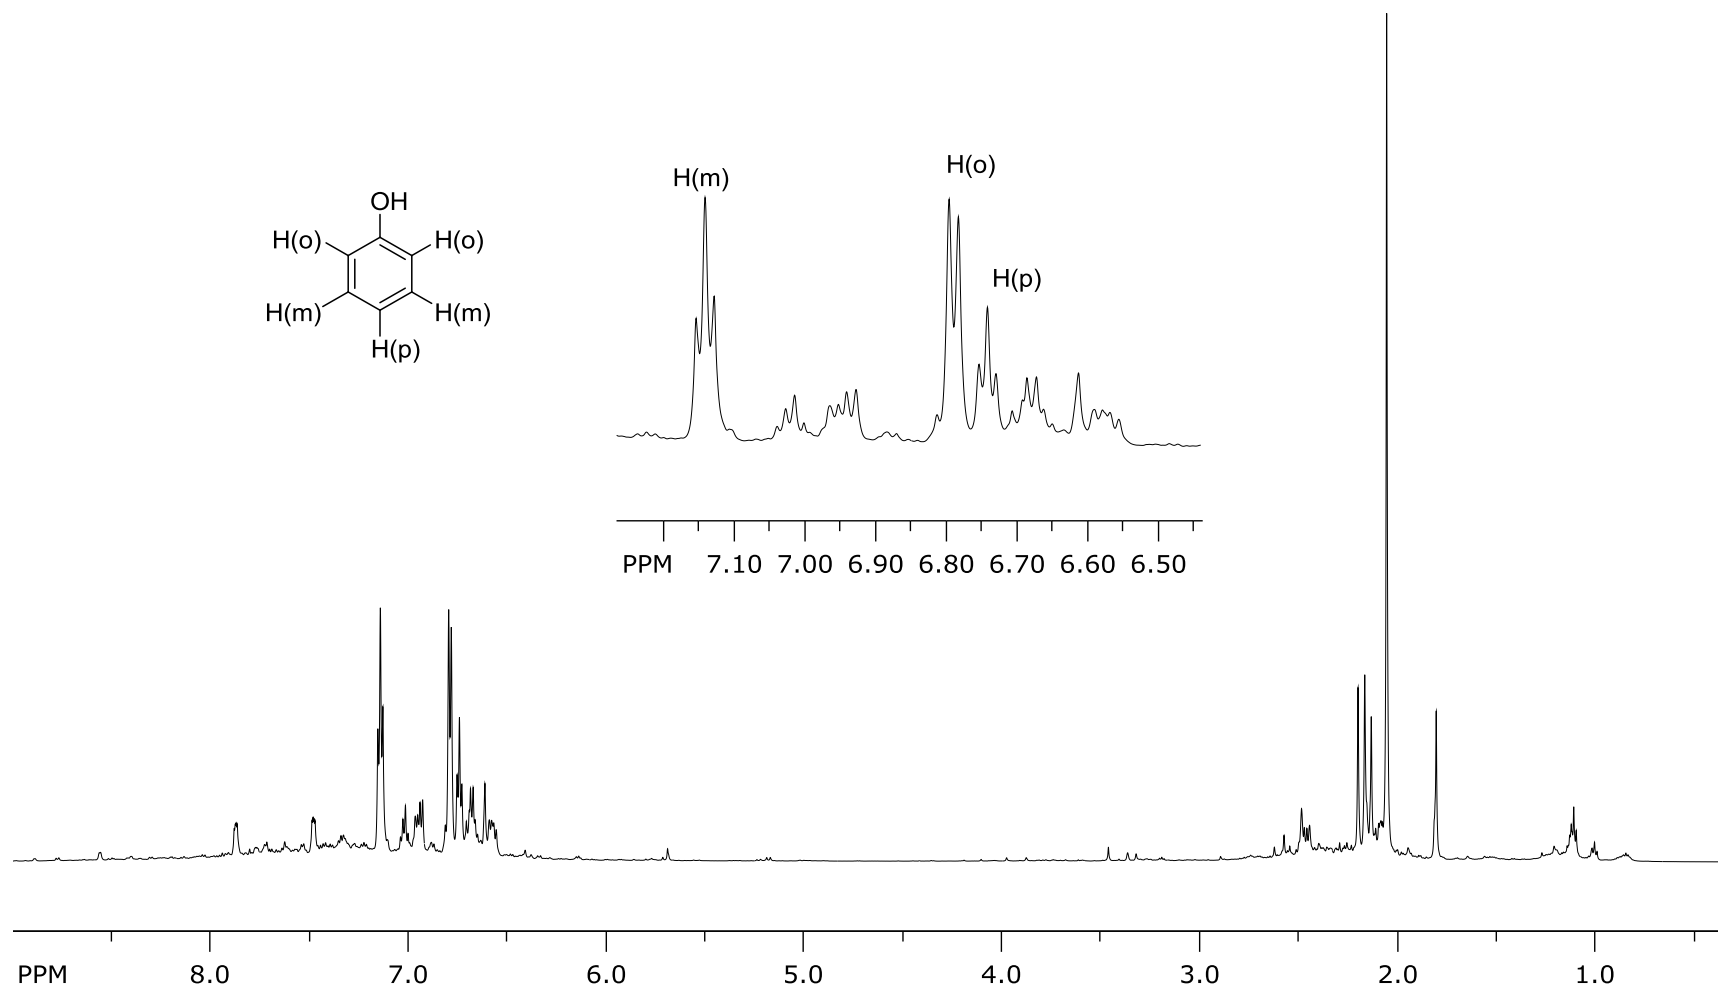

Figure S4 – <sup>1</sup>H NMR spectrum (600 MHz, DMSO-d<sub>6</sub>) fractions 3a phenolics extracted from horse manure bio-oil. Peaks assigned to phenol are labeled.

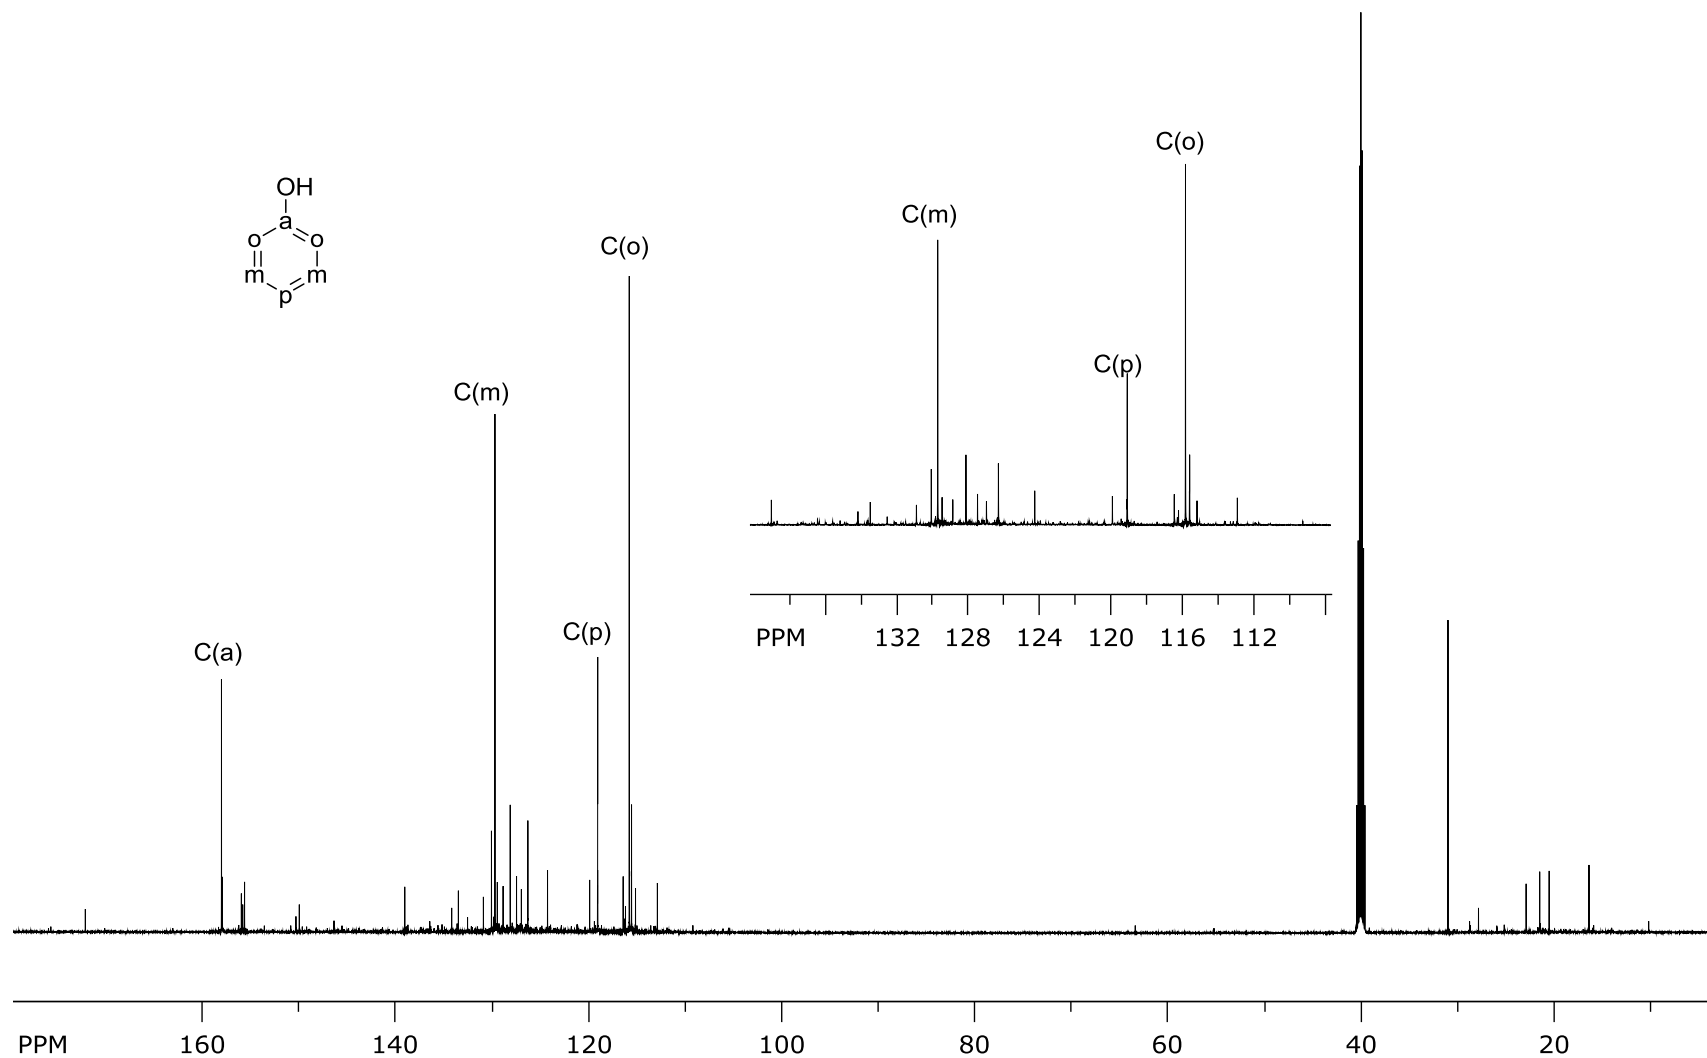

Figure S5 –  $^{13}\text{C}\{^1\text{H}\}$  NMR spectrum (150 MHz,  $\text{DMSO-d}_6$ ) fractions 3a phenolics extracted from horse manure bio-oil. Peaks assigned to phenol are labeled.

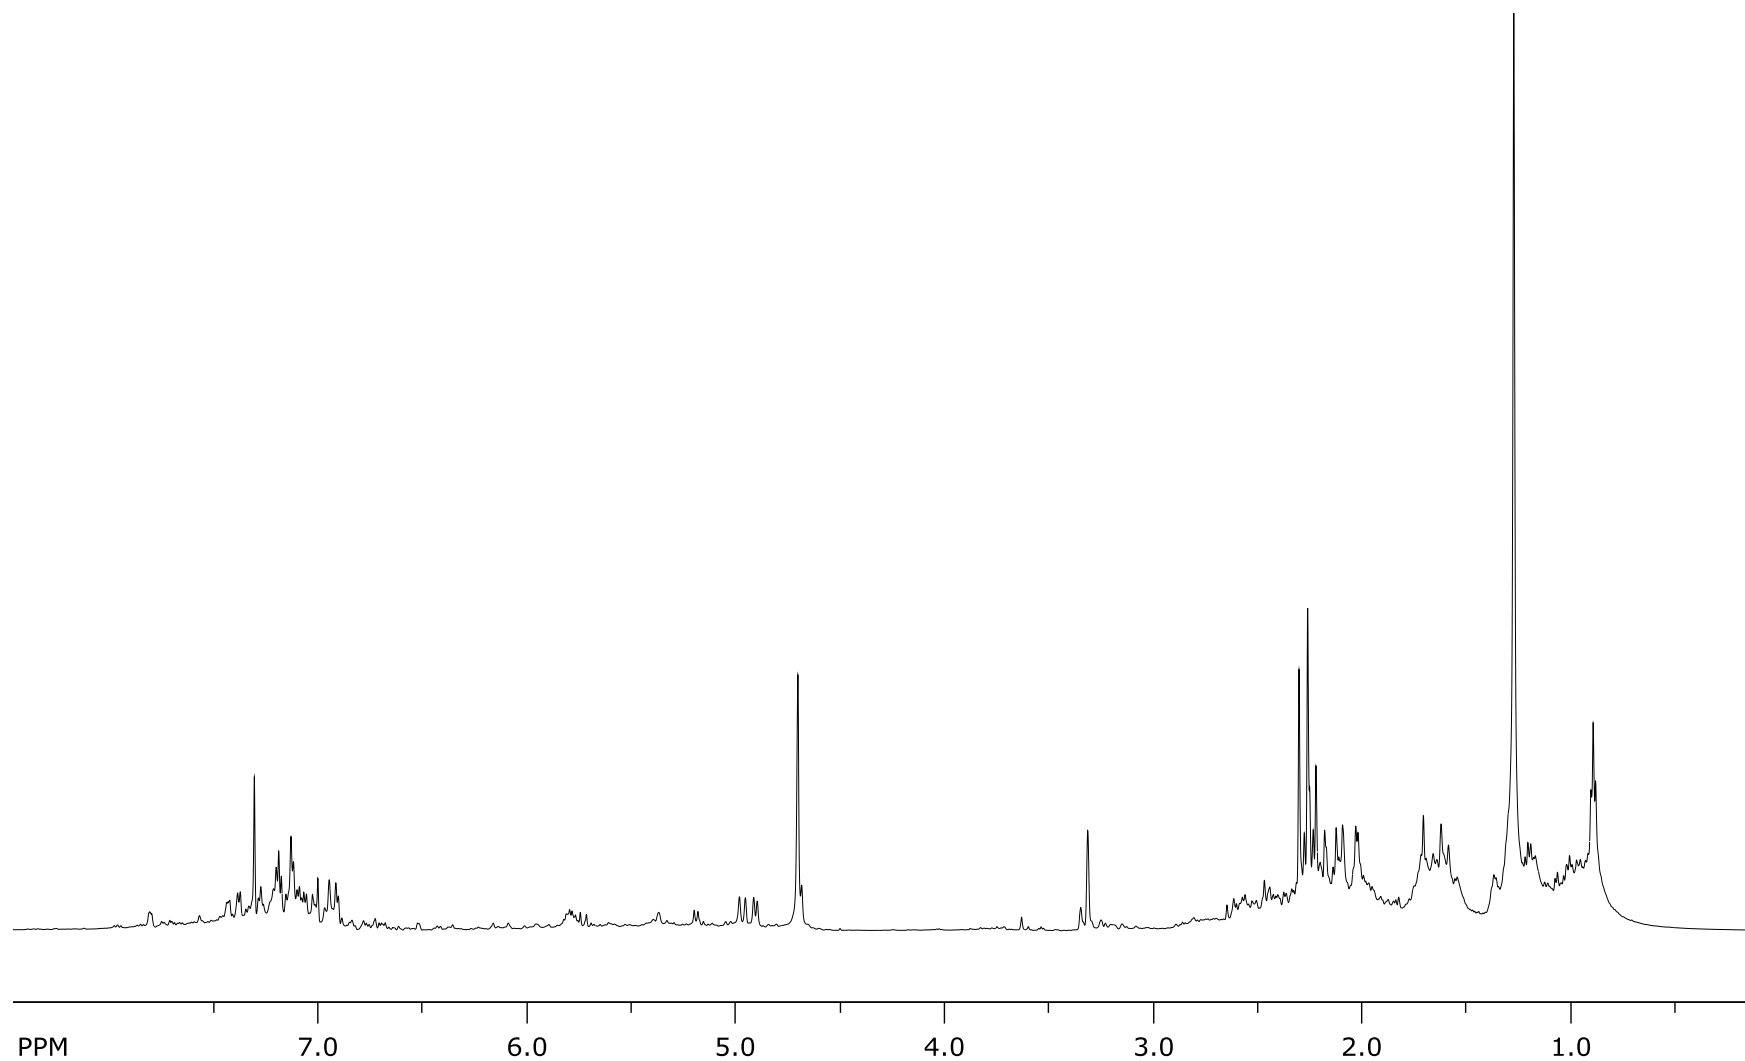

Figure S6.  $^1\text{H}$  NMR (600 MHz, DMSO- $d_6$ ) spectrum of fraction 2a hydrocarbons extracted from guayule bagasse bio-oil.

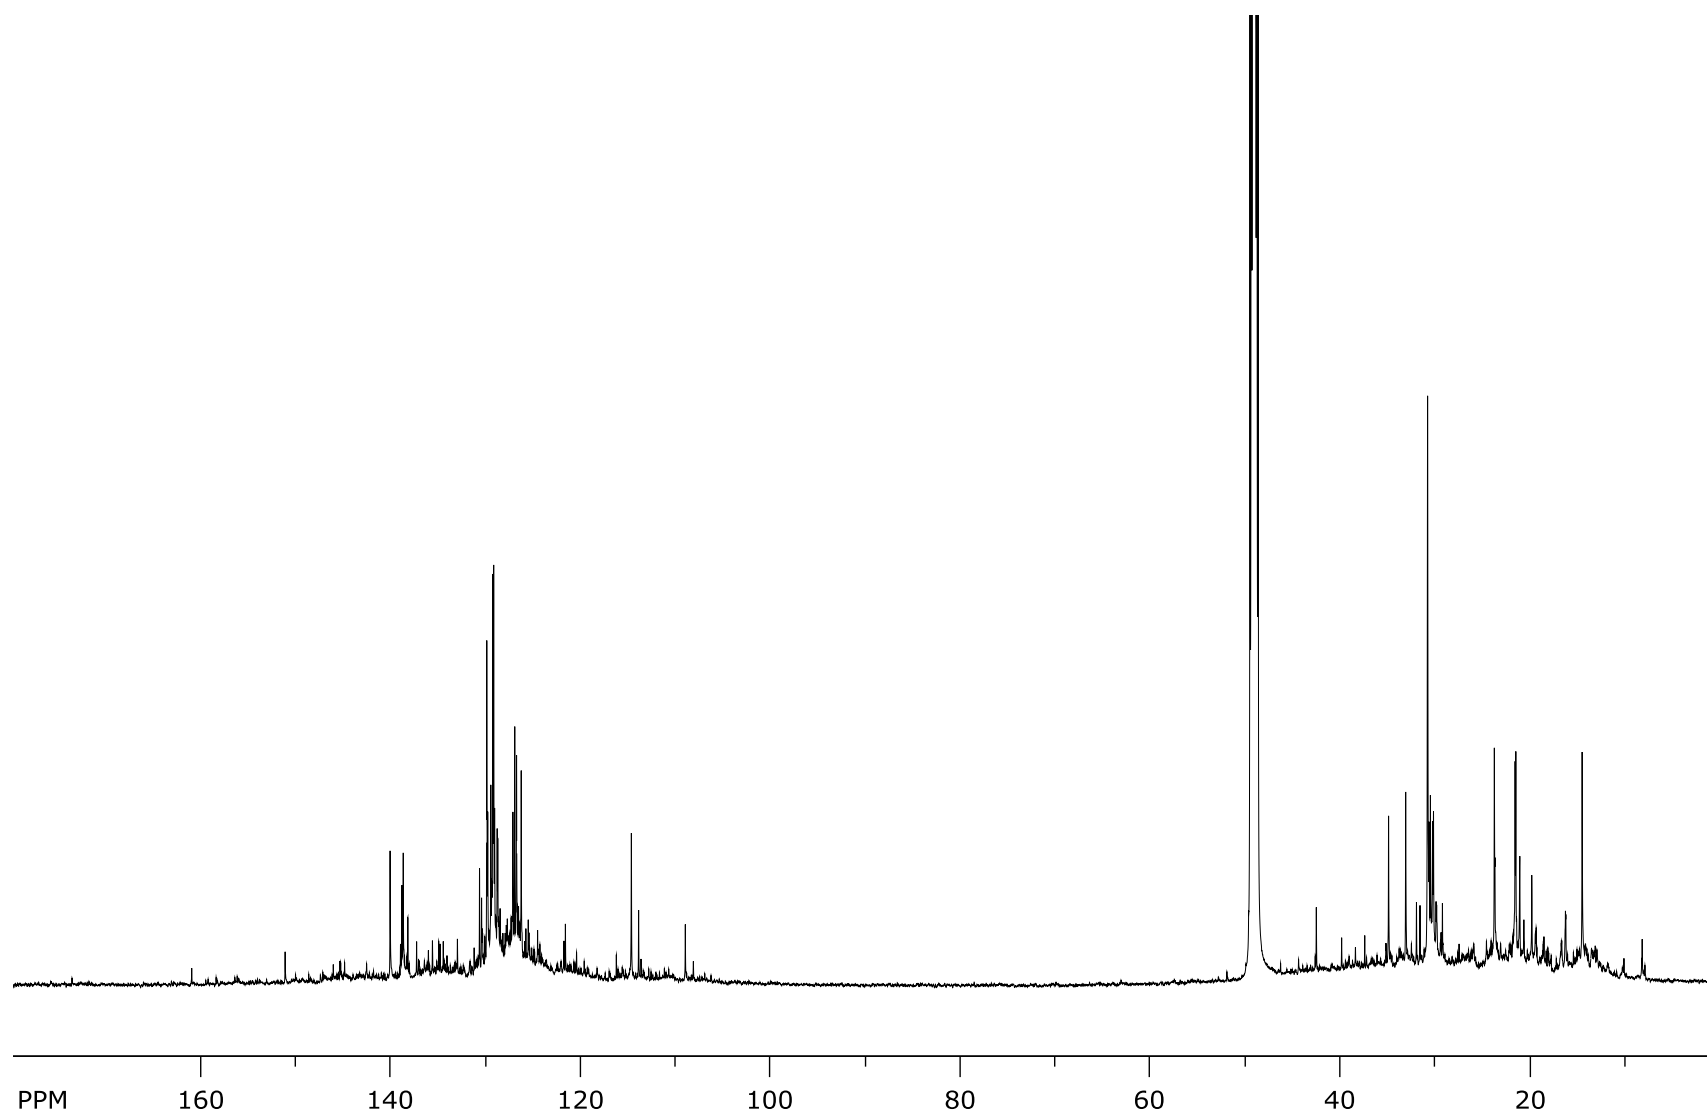

Figure S7–  $^{13}\text{C}\{^1\text{H}\}$  NMR spectrum (150 MHz,  $\text{DMSO-d}_6$ ) of fractions 2a hydrocarbons extracted from guayule bagasse bio-oil.



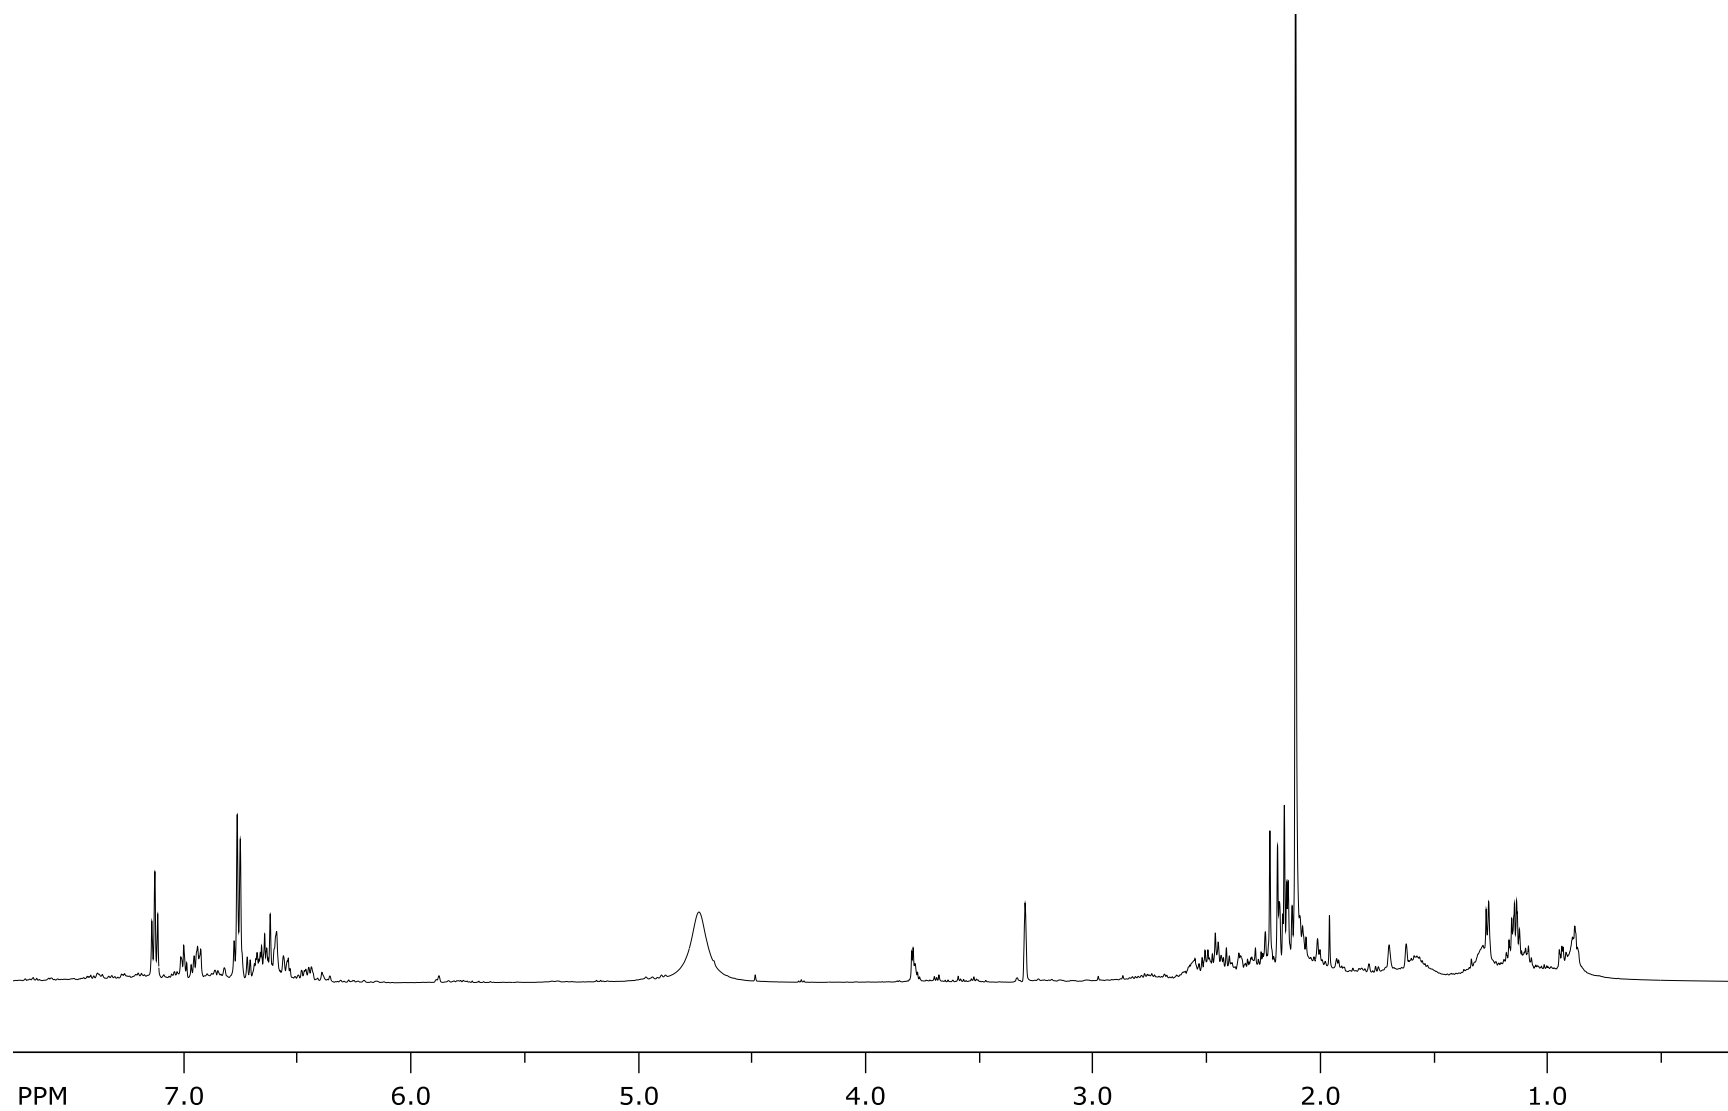

Figure S8 – <sup>1</sup>H NMR spectrum (600 MHz, DMSO-d<sub>6</sub>) fractions 3a phenolics extracted from guayule bagasse bio-oil.

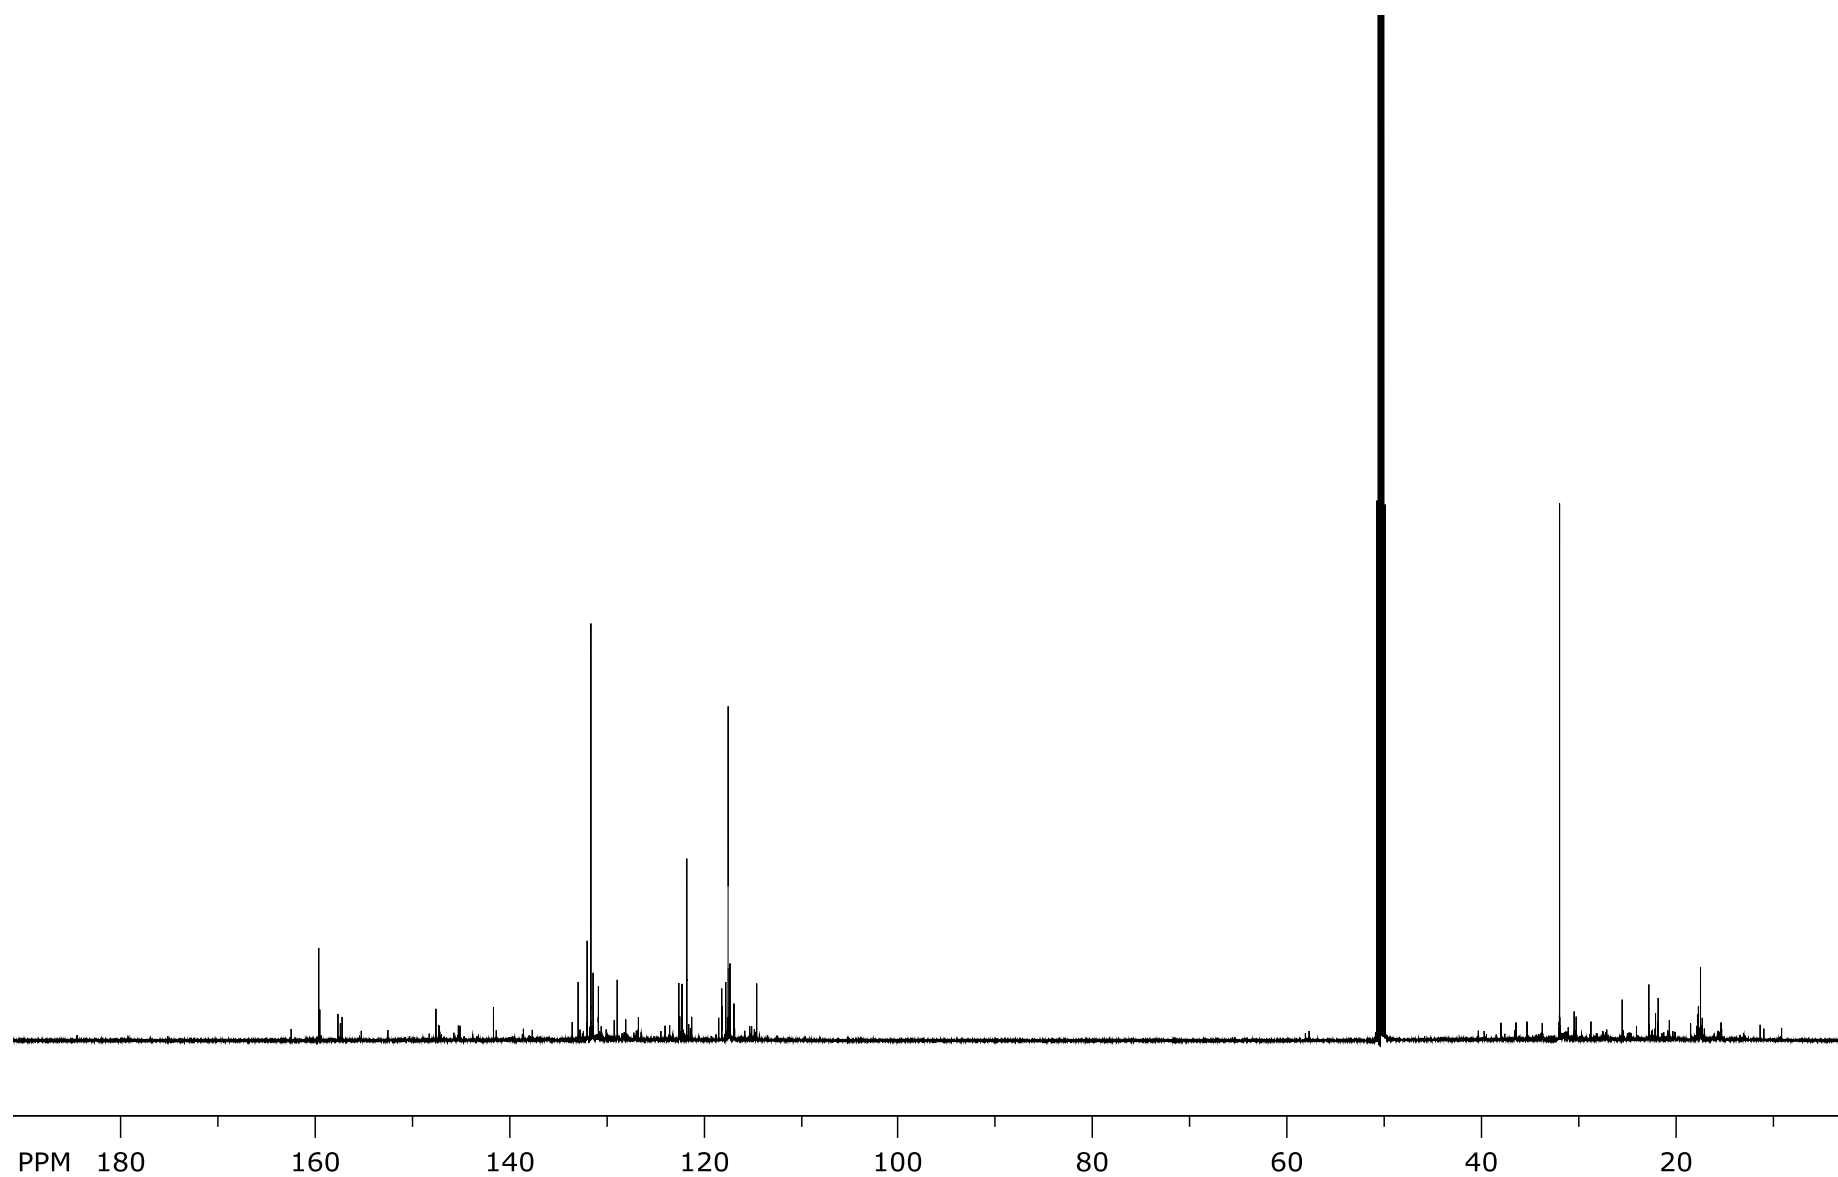

Figure S9—  $^{13}\text{C}\{^1\text{H}\}$  NMR spectrum (150 MHz,  $\text{DMSO-d}_6$ ) of fractions 3a phenolics extracted from guayule bagasse bio-oil.

|                |                   | horse litter | horse manure |
|----------------|-------------------|--------------|--------------|
| wt% of biomass | biomass           | 100          | 100          |
|                | bio-oil           | 35           | 36.9         |
|                | total distillates | 23.1         | 22.9         |
|                | HCs               | 9.9          | 12.6         |
|                | Phenols           | 11.4         | 8.0          |
|                | Acids             | 1.2          | 1.8          |
|                | total bottoms     | 10.9         | 9.2          |
|                | calcined coke     | 5.7          | 4.7          |
| g/100g biomass | NaOH, in          | 2.6          | 1.8          |
|                | HCl, in           | 2.4          | 1.7          |
|                | NaCl, out*        | 3.8          | 2.7          |
|                | NaCl, recov       | 2.5          | 1.3          |

Table S2 – Calculated yields of product streams for horse litter and horse manure biomasses, normalized with respect to the amount of biomass fed. (\*Calculated based on theoretical maximum from NaOH added)
